# Supplementary material for: Longitudinal Associations between the Neighborhood Built Environment and Cognition in US Older Adults: The Multi-Ethnic Study of Atherosclerosis
Source: MDPI journal article supplement (doi:10.3390/ijerph18157973), 2021-07-28
Supplement: s1 [file s1]

Table S1. Neighborhood characteristics by site

|                                        | Mean (SD)                         |                       |                        |                        |                   |                            |
|----------------------------------------|-----------------------------------|-----------------------|------------------------|------------------------|-------------------|----------------------------|
|                                        | Forsyth County,<br>North Carolina | New York, New<br>York | Baltimore,<br>Maryland | St. Paul,<br>Minnesota | Chicago, Illinois | Los Angeles,<br>California |
| At Exam 5                              |                                   |                       |                        |                        |                   |                            |
| Social destin. density <sup>a</sup>    | 14.5 (15.1)                       | 421.6 (275.4)         | 64.5 (69.5)            | 31.4 (29.0)            | 255.0 (299.1)     | 61.7 (53.6)                |
| Walking destin. density <sup>a</sup>   | 4.9 (7.8)                         | 240.6 (116.6)         | 20.7 (31.1)            | 14.5 (13.7)            | 89.8 (101.8)      | 31.2 (31.7)                |
| Network ratio <sup>a</sup>             | 0.24 (0.12)                       | 0.57 (0.13)           | 0.38 (0.19)            | 0.45 (0.17)            | 0.52 (0.14)       | 0.44 (0.14)                |
| Proportion retail <sup>a</sup>         | 0.016 (0.033)                     | 0.097 (0.036)         | 0.0124 (0.030)         | 0.011 (0.014)          | 0.084 (0.052)     | 0.050 (0.043)              |
| Neighborhood SES <sup>b</sup>          | -0.09 (0.93)                      | -1.08 (1.38)          | -0.36 (0.88)           | -0.04 (0.63)           | -1.62 (1.29)      | -0.12 (1.10)               |
| Population density <sup>a</sup>        | 691 (394)                         | 25,859 (10,028)       | 2,432 (1,793)          | 1,982 (1,014)          | 7,097 (5,034)     | 3,695 (2,247)              |
| Average annual change<br>(Exam 1 to 5) |                                   |                       |                        |                        |                   |                            |
| Social destin. density <sup>a</sup>    | 0.32 (1.51)                       | 11.07 (16.57)         | 0.91 (4.11)            | -0.64 (3.07)           | 5.23 (16.57)      | 1.02 (4.80)                |
| Walking destin. density <sup>a</sup>   | 0.06 (0.78)                       | 0.32 (9.05)           | -0.44 (2.28)           | -0.27 (2.10)           | -1.41 (6.92)      | -0.37 (2.73)               |
| Network ratio <sup>a</sup>             | -0.002 (0.010)                    | 0.002 (0.009)         | -0.003 (0.014)         | -0.004 (0.015)         | 0.001 (0.011)     | -0.001 (0.013)             |
| Proportion retail <sup>a</sup>         | -0.0001 (0.0029)                  | 0.0012 (0.0024)       | -0.0085 (0.0114)       | -0.0039 (0.0071)       | -0.0002 (0.0042)  | -0.0002 (0.0043)           |

Abbreviations: destin = destination; SES = socioeconomic status; SD = standard deviation

<sup>a</sup> Measured in ½-mile radial buffer surrounding residence

<sup>b</sup> Measured at US Census tract level

Table S2. Changes in built environment by residential moves

| Built environment changes   | n (%)                 |                 |                   | Chi-square p-value |
|-----------------------------|-----------------------|-----------------|-------------------|--------------------|
|                             | Never moved<br>n=1269 | 1 move<br>n=369 | ≥2 moves<br>n=178 |                    |
| Social destination density  |                       |                 |                   |                    |
| <1SD from mean              | 0 (0.0%)              | 43 (11.7%)      | 17 (9.6%)         | <.0001             |
| ±1SD from mean              | 1120 (88.3%)          | 302 (81.8%)     | 148 (83.2%)       |                    |
| >1SD from mean              | 149 (11.7%)           | 24 (6.5%)       | 13 (7.3%)         |                    |
| Walking destination density |                       |                 |                   |                    |
| <1SD from mean              | 11 (0.9%)             | 49 (13.3%)      | 22 (12.4%)        | <.0001             |
| ±1SD from mean              | 1206 (95.0%)          | 294 (79.7%)     | 142 (79.8%)       |                    |
| >1SD from mean              | 52 (4.1%)             | 26 (7.1%)       | 14 (7.9%)         |                    |
| Network ratio               |                       |                 |                   |                    |
| <1SD from mean              | 15 (1.2%)             | 123 (33.3%)     | 60 (33.7%)        | <.0001             |
| ±1SD from mean              | 1201 (94.6%)          | 194 (52.6%)     | 88 (49.4%)        |                    |
| >1SD from mean              | 53 (4.2%)             | 52 (14.1%)      | 30 (16.9%)        |                    |
| Proportion retail           |                       |                 |                   |                    |
| <1SD from mean              | 113 (9.0%)            | 37 (10.1%)      | 23 (12.9%)        | <.0001             |
| ±1SD from mean              | 1134 (90.1%)          | 303 (82.8%)     | 131 (73.6%)       |                    |
| >1SD from mean              | 12 (1.0%)             | 26 (7.1%)       | 24 (13.5%)        |                    |

Table S3. Unadjusted association between built environment and maintained/improved cognition

| At Exam 5 <sup>a,b</sup>    | Maintained/improved CASI score <sup>c</sup> |         | Maintained/improved DSC score <sup>c</sup> |         |
|-----------------------------|---------------------------------------------|---------|--------------------------------------------|---------|
|                             | OR (95% CI)                                 | p-value | OR (95% CI)                                | p-value |
| Social destination density  | 1.00006 (0.99995, 1.00017)                  | 0.31    | 1.00004 (0.99994, 1.00014)                 | 0.45    |
| Walking destination density | 1.00009 (0.99985, 1.00032)                  | 0.47    | 0.99996 (0.99974, 1.00018)                 | 0.72    |
| Network ratio               | 1.01 (0.89, 1.16)                           | 0.83    | 0.86 (0.76,0.97)                           | 0.01    |
| Proportion retail           | 1.55 (0.95, 2.55)                           | 0.08    | 1.16 (0.74,1.80)                           | 0.52    |

Abbreviation: OR = Odds ratio; CI =Confidence Interval; CASI = Cognitive Abilities Screening Instrument; DSC = Digit Symbol Coding

<sup>a</sup> Measured in ½-mile radial buffer surrounding residence

<sup>b</sup> Continuous measures

<sup>c</sup> Maintained/improved score versus decline in score from Exam 5 to 6

Table S4. Unadjusted association between average annual built environment changes and maintained/improved cognition

| Average annual change (Exam 1 to 5) <sup>a,b</sup> | Maintained/improved CASI score <sup>d</sup> |         | Maintained/improved DSC score <sup>d</sup> |         |
|----------------------------------------------------|---------------------------------------------|---------|--------------------------------------------|---------|
|                                                    | OR (95% CI)                                 | p-value | OR (95% CI)                                | p-value |
| Social destination density                         | 1.002 (0.999, 1.004)                        | 0.15    | 1.001 (0.999, 1.003)                       | 0.35    |
| Walking destination density                        | 1.002 (0.997, 1.006)                        | 0.51    | 1.001 (0.997, 1.006)                       | 0.59    |
| Network ratio                                      | 1.69 (0.27, 10.62)                          | 0.58    | 0.73 (0.14, 3.98)                          | 0.72    |
| Proportion retail <sup>c</sup>                     | 6.27 (0.08, 508.41)                         | 0.41    | 0.20 (0.00, 10.54)                         | 0.42    |

Abbreviation: OR = odds ratio; CI =Confidence Interval; CASI = Cognitive Abilities Screening Instrument; DSC = Digit Symbol Coding

<sup>a</sup> Continuous measures

<sup>b</sup> Measured in ½-mile radial buffer surrounding residence

<sup>c</sup> Variable was log transformed and top and bottom 1 percentile deleted to improve efficiency of the estimate

<sup>d</sup> Maintained/improved score versus decline in score from Exam 5 to 6

Table S5. Adjusted association between built environment and maintained/improved cognition, using Inverse Probability Weighted to account for attrition and selection bias

| Built environment characteristic at Exam 5 <sup>a</sup> | Buffer size | Maintained/improved CASI score <sup>b,c</sup> |         | Maintained/improved DSC score <sup>b,c</sup> |             |
|---------------------------------------------------------|-------------|-----------------------------------------------|---------|----------------------------------------------|-------------|
|                                                         |             | OR (95% CI)                                   | p-value | OR (95% CI)                                  | p-value     |
| Social destination density (per 100)                    | ½-mile      | 1.00 (0.99, 1.01)                             | 0.90    | 1.01 (1.00, 1.01)                            | 0.14        |
| Walking destination density (per 100)                   | ½-mile      | 1.00 (0.98, 1.02)                             | 0.81    | 1.02 (1.00, 1.03)                            | 0.07        |
| Network ratio                                           | ½-mile      | 0.98 (0.82, 1.16)                             | 0.78    | 0.95 (0.82, 1.11)                            | 0.53        |
| Proportion retail                                       | ½-mile      | 1.20 (0.59, 2.43)                             | 0.61    | 1.86 (0.99, 3.50)                            | 0.06        |
| Social destination density (per 100)                    | 1-mile      | 1.00 (0.99, 1.01)                             | 0.99    | 1.01 (1.00, 1.02)                            | 0.09        |
| Walking destination density (per 100)                   | 1-mile      | 1.00 (0.97, 1.03)                             | 0.85    | <b>1.03 (1.00, 1.05)</b>                     | <b>0.03</b> |
| Network ratio                                           | 1-mile      | 1.04 (0.86, 1.25)                             | 0.71    | 0.95 (0.81, 1.13)                            | 0.57        |
| Proportion retail                                       | 1-mile      | 1.58 (0.55, 4.44)                             | 0.40    | 1.76 (0.70, 4.43)                            | 0.23        |

Abbreviation: CI =Confidence Interval; CASI = Cognitive Abilities Screening Instrument; DSC = Digit Symbol Coding

<sup>a</sup> Continuous measures

<sup>b</sup> Maintained/improved score versus decline in score from Exam 5 to 6

<sup>c</sup> Controlling for age at Exam 5, sex, education, race/ethnicity, income, neighborhood socioeconomic status, site, APOE e4 carrier, neighborhood perception of safety walking day or night and crime, arthritis, cardiovascular and cerebrovascular disease, diabetes, number of residential moves

Table S6. Adjusted association between built environment characteristics and continuous cognitive change measures

| Built environment characteristic measured at Exam 5 <sup>a,b</sup> | Variable name  | Change in CASI score <sup>c</sup> |         | Change in DSC score <sup>c</sup> |         |
|--------------------------------------------------------------------|----------------|-----------------------------------|---------|----------------------------------|---------|
|                                                                    |                | Estimate (95% CI)                 | p-value | Estimate (95% CI)                | p-value |
| Social destination density                                         | SDD            | -0.0020 (-0.0040, 0.0001)         | 0.06    | 0.0012 (-0.0038, 0.0062)         | 0.65    |
|                                                                    | SDD×years      | 0.0000 (-0.0002, 0.0003)          | 0.93    | -0.0003 (-0.0009, 0.0003)        | 0.40    |
| Walking destination density                                        | WDD            | -0.0061 (-0.0106, -0.0016)        | 0.009   | 0.0014 (-0.0098, 0.0126)         | 0.81    |
|                                                                    | WDD×years      | -0.0001 (-0.0007, 0.0005)         | 0.70    | -0.0009 (-0.0022, 0.0004)        | 0.19    |
| Network ratio                                                      | NETRATIO       | -1.33 (-3.20, 0.54)               | 0.17    | -0.88 (-5.45, 3.67)              | 0.71    |
|                                                                    | NETRATIO×years | -0.01 (-0.33, 0.31)               | 0.96    | -0.61 (-1.35, 0.12)              | 0.10    |
| Proportion retail                                                  | PRET           | -6.77 (-14.46, 0.85)              | 0.09    | -1.75 (-20.12, 16.64)            | 0.85    |
|                                                                    | PRET×years     | 0.47 (-0.78, 1.72)                | 0.46    | -1.41 (-4.24, 1.42)              | 0.33    |

Abbreviation: CI =Confidence Interval; CASI = Cognitive Abilities Screening Instrument; DSC = Digit Symbol Coding

<sup>a</sup> Measured in ½-mile radial buffer surrounding residence

<sup>b</sup> Continuous measures

<sup>c</sup> Controlling for age at Exam 5, sex, education, race/ethnicity, income, neighborhood socioeconomic status, site, APOE e4 carrier, neighborhood perception of safety walking day or night and crime, arthritis, cardiovascular and cerebrovascular disease, diabetes, number of residential moves

Table S7. Adjusted association between average annual built environment changes and maintained/improved cognition

| Average annual change <sup>a</sup> | Buffer size | Maintained/improved CASI score <sup>c,d</sup> |         | Maintained/improved DSC score <sup>c,d</sup> |         |
|------------------------------------|-------------|-----------------------------------------------|---------|----------------------------------------------|---------|
|                                    |             | Log OR (95% CI)                               | p-value | Log OR (95% CI)                              | p-value |
| Social destination density         | ½-mile      | 1.0007 (0.9979, 1.0033)                       | 0.63    | 1.0018 (0.9994, 1.0042)                      | 0.14    |
| Walking destination density        | ½-mile      | 1.0011 (0.9959, 1.0062)                       | 0.69    | 1.0030 (0.9983, 1.0077)                      | 0.22    |
| Network ratio                      | ½-mile      | 1.06 (0.14, 7.70)                             | 0.95    | 0.64 (0.11, 3.86)                            | 0.63    |
| Proportion retail                  | ½-mile      | 0.98 (0.00, 201.40)                           | 0.99    | 0.96 (0.01, 111.90)                          | 0.99    |
| Social destination density         | 1-mile      | 1.0018 (0.9980, 1.0055)                       | 0.36    | 1.0021 (0.9987, 1.0055)                      | 0.23    |
| Walking destination density        | 1-mile      | 1.0029 (0.9955, 1.0103)                       | 0.45    | 1.0037 (0.9970, 1.0104)                      | 0.28    |
| Network ratio                      | 1-mile      | 1.09 (0.11, 10.69)                            | 0.94    | 0.58 (0.07, 4.53)                            | 0.60    |
| Proportion retail                  | 1-mile      | 11.53 (0.02, 5612.40)                         | 0.45    | 0.34 (0.00, 86.05)                           | 0.71    |

Abbreviation: OR = odds ratio; CI = Confidence Interval; CASI = Cognitive Abilities Screening Instrument; DSC = Digit Symbol Coding

<sup>a</sup> Continuous measures

<sup>b</sup> Variable was log transformed and top and bottom 1 percentile deleted to improve efficiency of the estimate

<sup>c</sup> Maintained/improved score versus decline in score from Exam 5 to 6

<sup>d</sup> Controlling for age at Exam 5, sex, education, race/ethnicity, income, neighborhood socioeconomic status, site, APOE e4 carrier, neighborhood perception of safety walking day or night and crime, arthritis, cardiovascular and cerebrovascular disease, diabetes, number of residential moves
